# Supplementary material for: Mechanistic Intimate Insights into the Role of Hydrogen Sulfide in Alzheimer’s Disease: A Recent Systematic Review
Source: MDPI journal article supplement (doi:10.3390/ijms242015481), 2023-10-23
Supplement: s1 [file s1]

# Mechanistic Intimate Insights into the Role of Hydrogen Sulfide in Alzheimer's Disease: A Recent Systematic Review

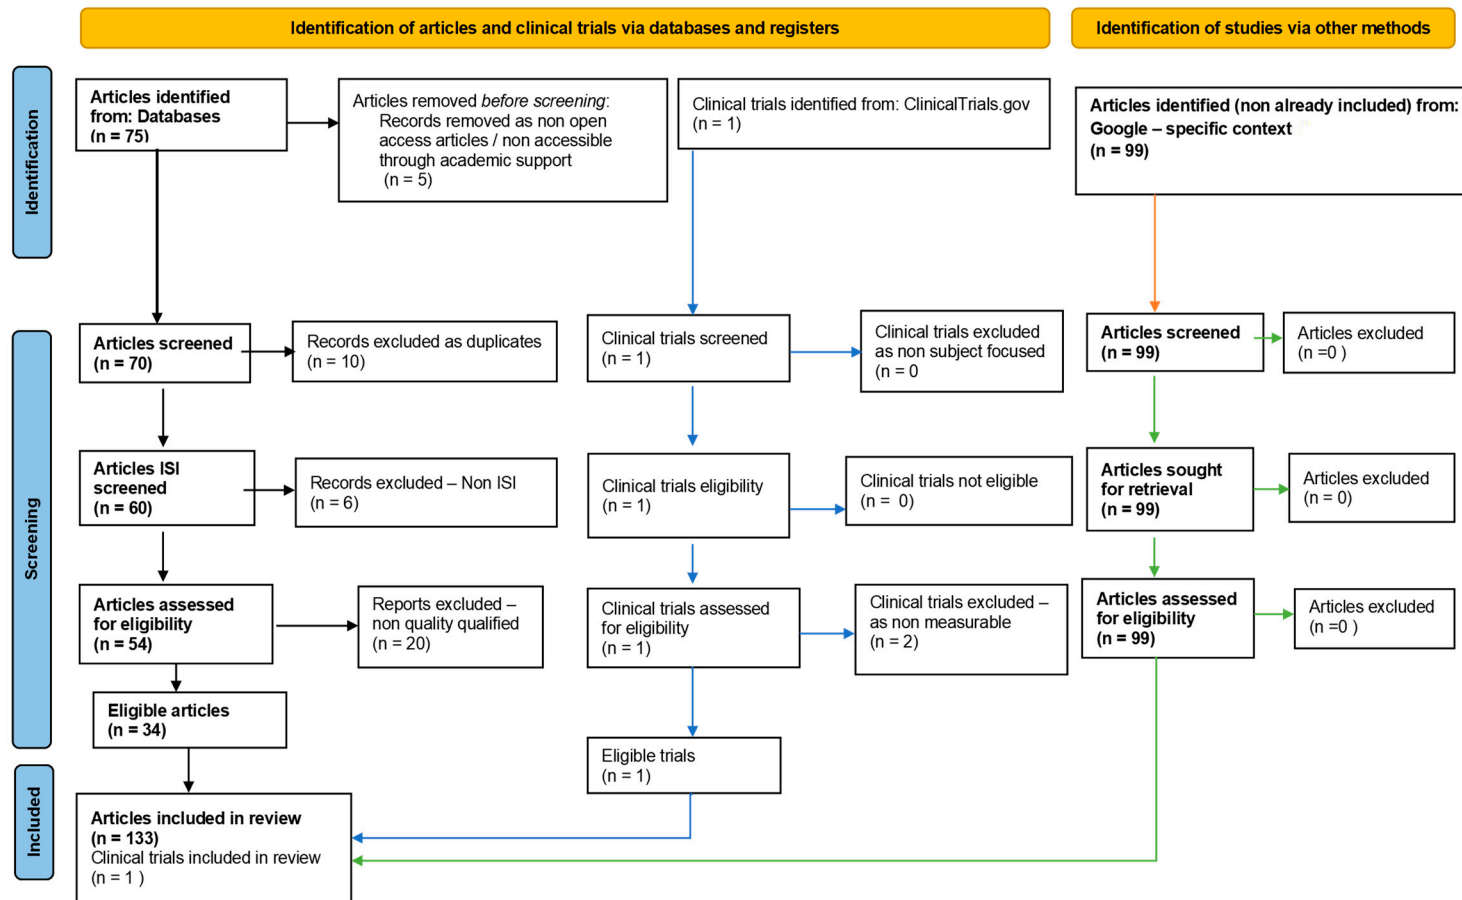

Figure S1. PRISMA data flow diagram.
